# Supplementary material for: Active site engineering of intermetallic nanoparticles by the vapour–solid synthesis: carbon black supported nickel tellurides for hydrogen evolution
Source: Royal Society of Chemistry journal article supplement (doi:10.1039/d4nr03397c), 2024-01-01
Supplement: d4nr03397c1.pdf [file d4nr03397c1.pdf]

*Supplementary Material:*

## Active Site Engineering of Intermetallic Nanoparticles by the Vapour-Solid Synthesis: Carbon Black Supported Nickel Tellurides for Hydrogen Evolution

Daniel Garstenaue<sup>a,b</sup>, Patrick Guggenberger<sup>a,b</sup>, Ondřej Zobač<sup>c</sup>, Franz Jirsa<sup>d,e</sup>, Klaus W. Richter<sup>a,f\*</sup>

<sup>a</sup> Department of Functional Materials & Catalysis, University of Vienna, Josef-Holaubek-Platz 2, 1090 Vienna, Austria

<sup>b</sup> Vienna Doctoral School in Chemistry, University of Vienna, Währinger Straße 42, 1090 Vienna, Austria

<sup>c</sup> Institute of Physics of Materials, Czech Academy of Sciences, Žitkova 22, 61600 Brno, Czech Republic

<sup>d</sup> Department of Inorganic Chemistry, University of Vienna, Josef-Holaubek-Platz 2, 1090 Vienna, Austria

<sup>e</sup> Department of Zoology, University of Johannesburg, Auckland Park, 2006 Johannesburg, South Africa

<sup>f</sup> X-ray Structure Analysis Centre, University of Vienna, Währinger Straße 42, 1090 Vienna, Austria

\*Email: klaus.richter@univie.ac.at

### Total X-Ray fluorescence spectroscopy

#### Recovery rate experiment tellurium

A recovery rate experiment was carried out to assure the accuracy of tellurium concentrations from TXRF investigations. Therefore, 500  $\mu\text{L}$  of a  $\beta_{\text{standard}}(\text{Te}) = 10 \text{ mg L}^{-1}$  tellurium standard solution, 500  $\mu\text{L}$  of a 30  $\text{mg L}^{-1}$  gallium standard solution, as internal standard, and 100  $\mu\text{L}$  polyvinyl alcohol solution were mixed. 5  $\mu\text{L}$  of the as-prepared mixture were drop cast onto the sample carrier and dried under IR irradiation for 45 min. After investigation by TXRF the correction factor for tellurium was calculated as  $\beta_{\text{standard}}(\text{Te})$  over  $\beta_{\text{TXRF}}(\text{Te})$ . The observed factor was used to correct the tellurium concentrations of all investigated Ni-Te samples.

Table S 1.: TXRF tellurium recovery rate experiment

| measurement | $\beta_{\text{TXRF}}(\text{Te}) [\text{mg L}^{-1}]$ | correction factor |
|-------------|-----------------------------------------------------|-------------------|
| 1           | 23.07                                               | 0.43              |
| 2           | 23.87                                               | 0.42              |
| 3           | 23.87                                               | 0.42              |
| 4           | 20.36                                               | 0.49              |
| 5           | 20.22                                               | 0.49              |

## Sample quantification

Table S 2.: TXRF sample investigations (Te values are not corrected), 30 mg L<sup>-1</sup> gallium as internal standard

| sample                               | weighed mass [mg] | $\beta(\text{Te})$ [mg L <sup>-1</sup> ] | $\beta(\text{Ni})$ [mg L <sup>-1</sup> ] |
|--------------------------------------|-------------------|------------------------------------------|------------------------------------------|
| Ni/C_16                              | 26.51             | -                                        | 42.82                                    |
| Ni <sub>85</sub> Te <sub>15</sub> /C | 20.39             | 24.61                                    | 35.88                                    |
| Ni <sub>78</sub> Te <sub>22</sub> /C | 29.10             | 10.12                                    | 12.08                                    |
| Ni <sub>49</sub> Te <sub>51</sub> /C | 16.06             | 46.03                                    | 12.54                                    |
| Ni <sub>39</sub> Te <sub>61</sub> /C | 19.76             | 78.74                                    | 12.14                                    |
| Ni/C_7                               | 22.86             | -                                        | 16.39                                    |
| Ni <sub>67</sub> Te <sub>33</sub> /C | 21.46             | 40.32                                    | 20.59                                    |
| Ni <sub>85</sub> Te <sub>15</sub> /C | 23.39             | 49.56                                    | 20.14                                    |

## Powder X-Ray diffraction

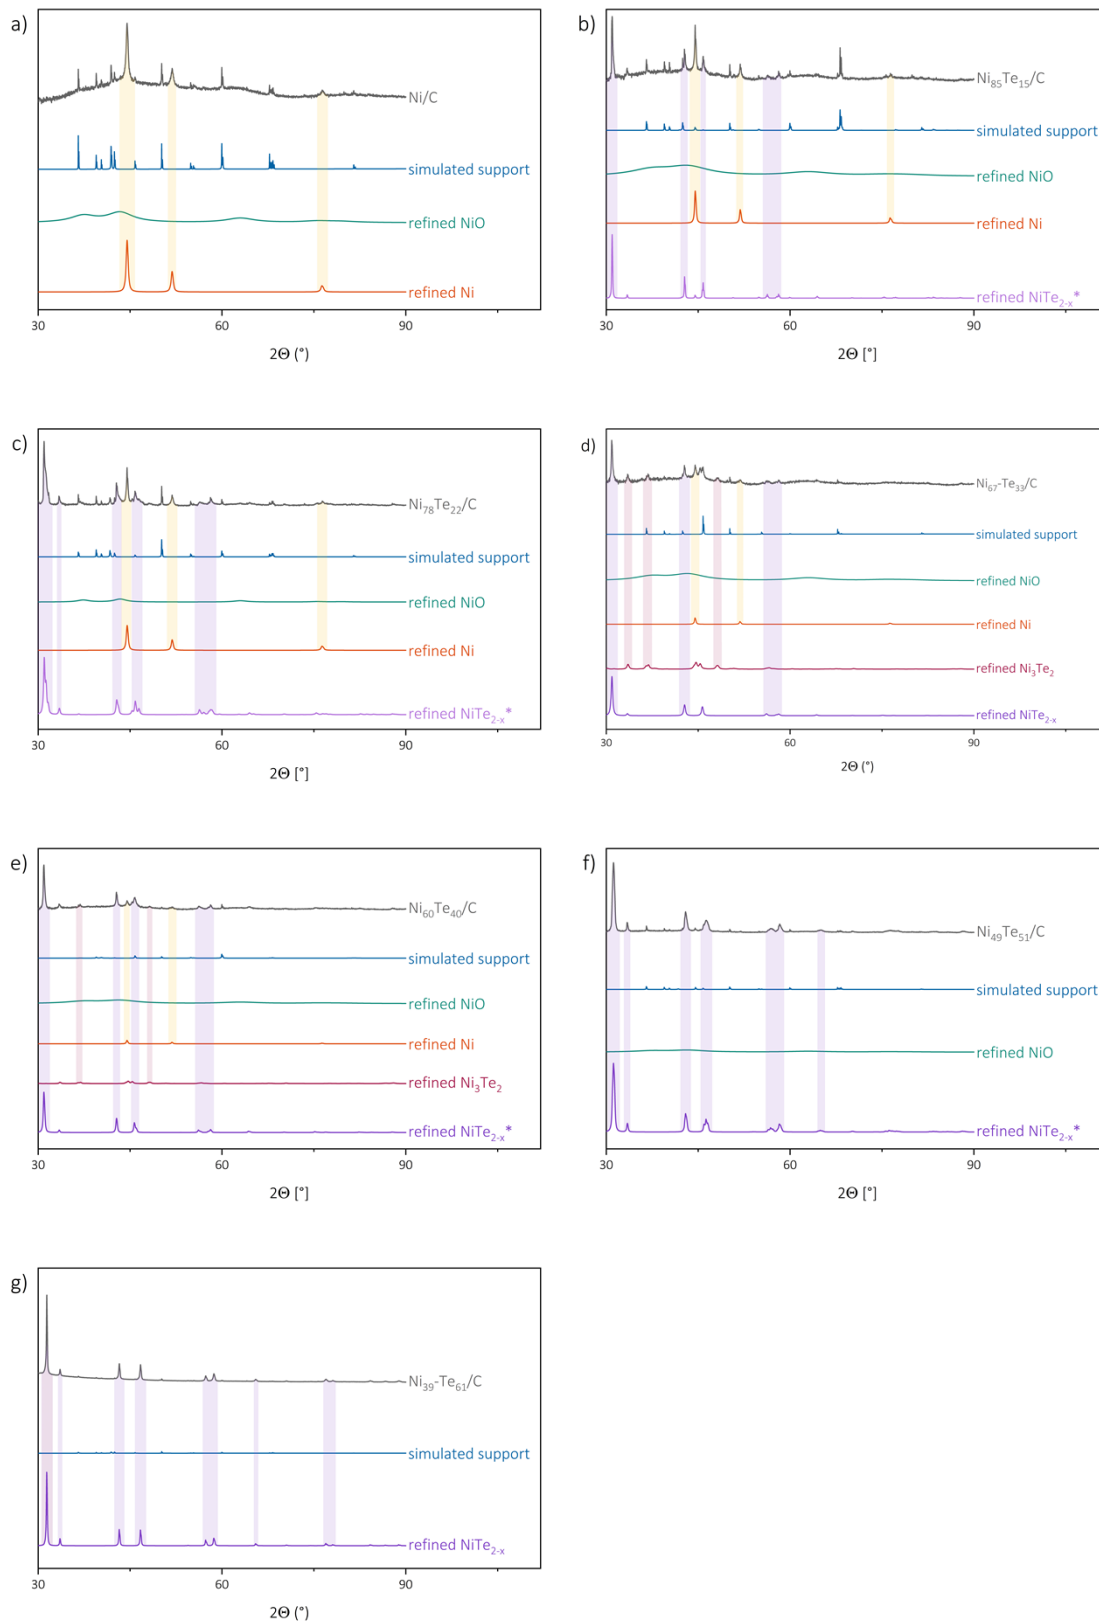

Figure S 1.: measured and refined tXRF patterns with the most significant peaks highlighted of Ni/C and intermetallic Ni-Te/C samples with ascending Te content from (a) to (g). \*combined NiTe<sub>2-x</sub> patterns with different parameter sets.

# Physisorption

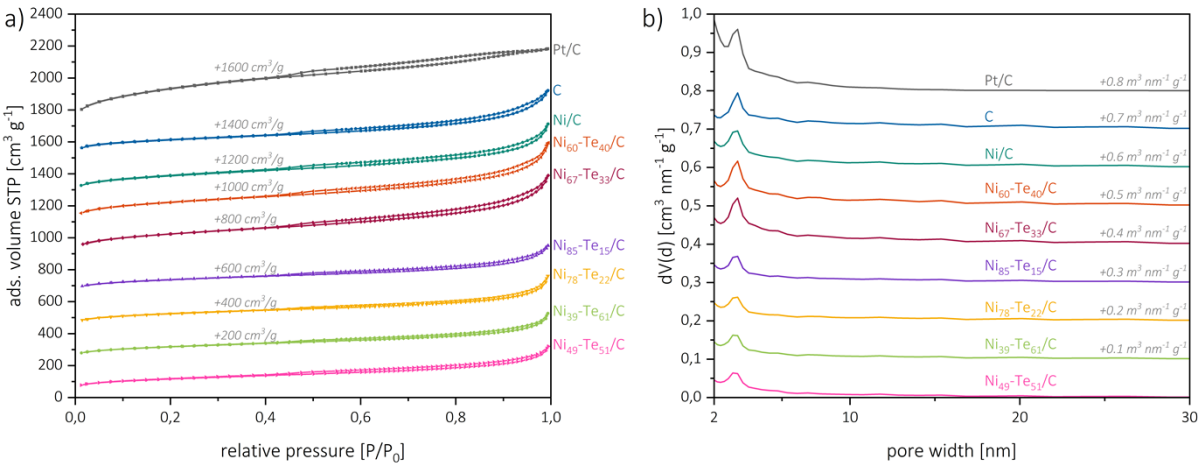

Figure S 2: Nitrogen physisorption isotherms recorded at  $-196\text{ }^{\circ}\text{C}$  of carbon black based materials (a) and respective QSDFT pore size distributions (b).

## Cyclic voltammetry

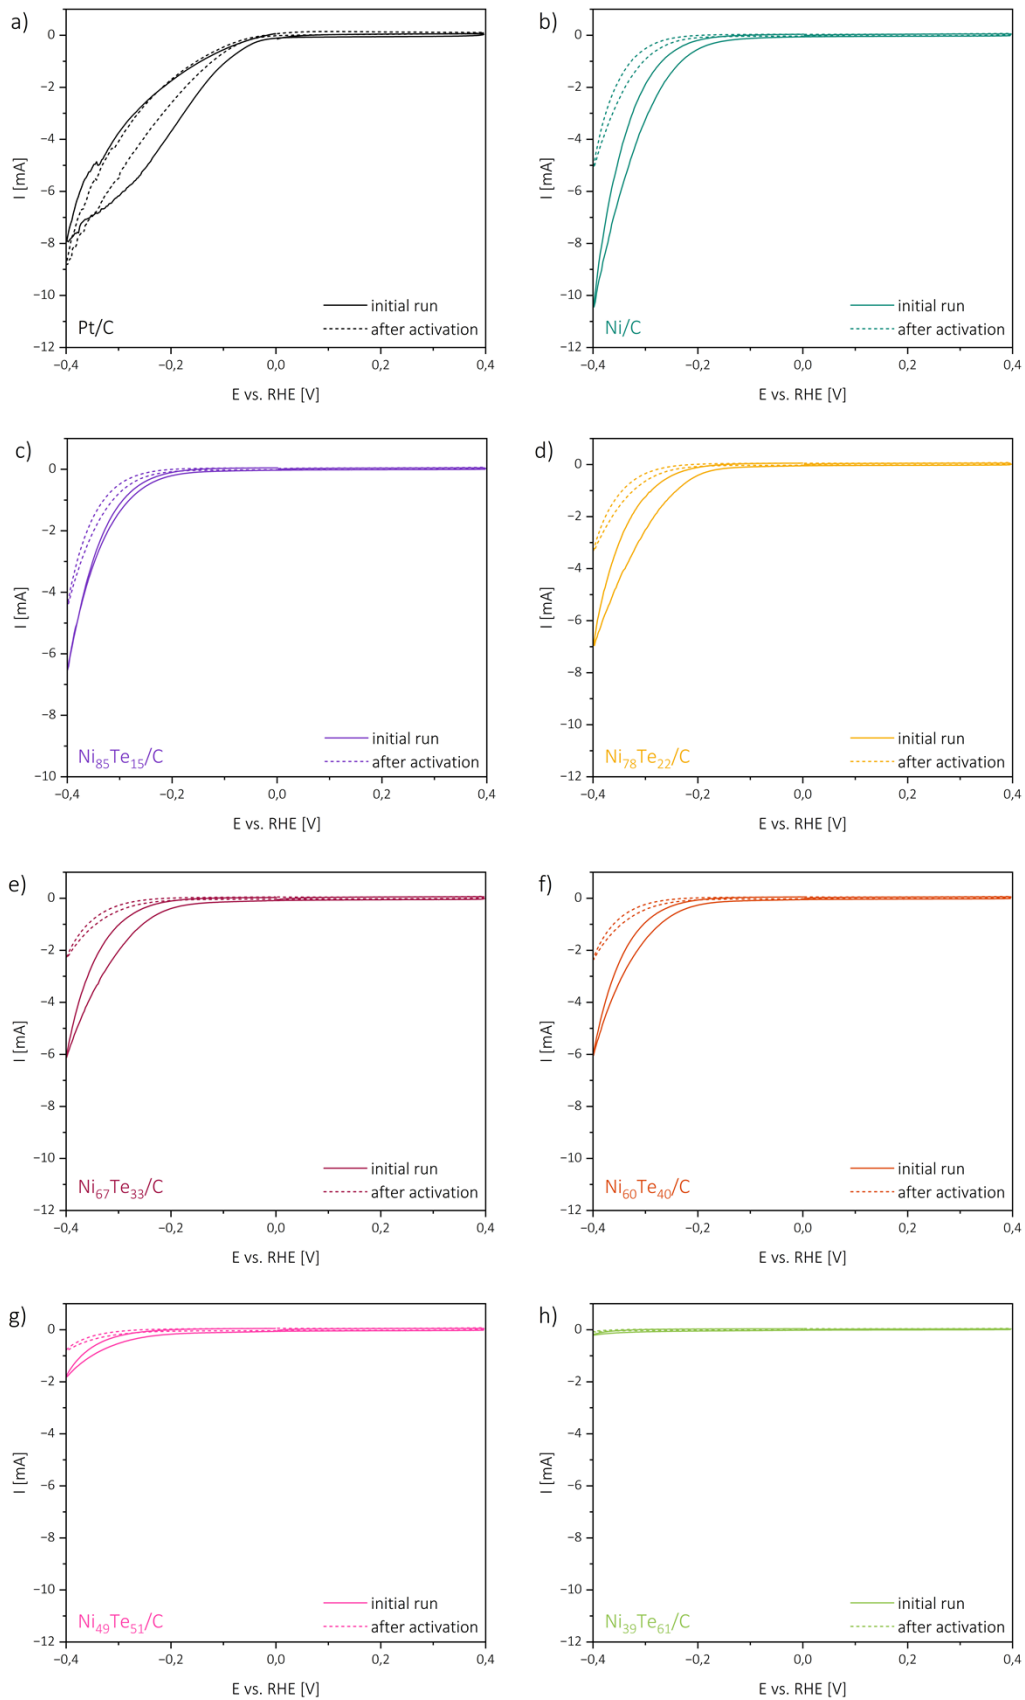

Figure S 3.: Cyclic voltammetry curves before and after activation from Pt/C (a); Ni/C (b); and intermetallic Ni-Te/C samples with ascending tellurium contents (d) to (h).

## Double layer capacitance

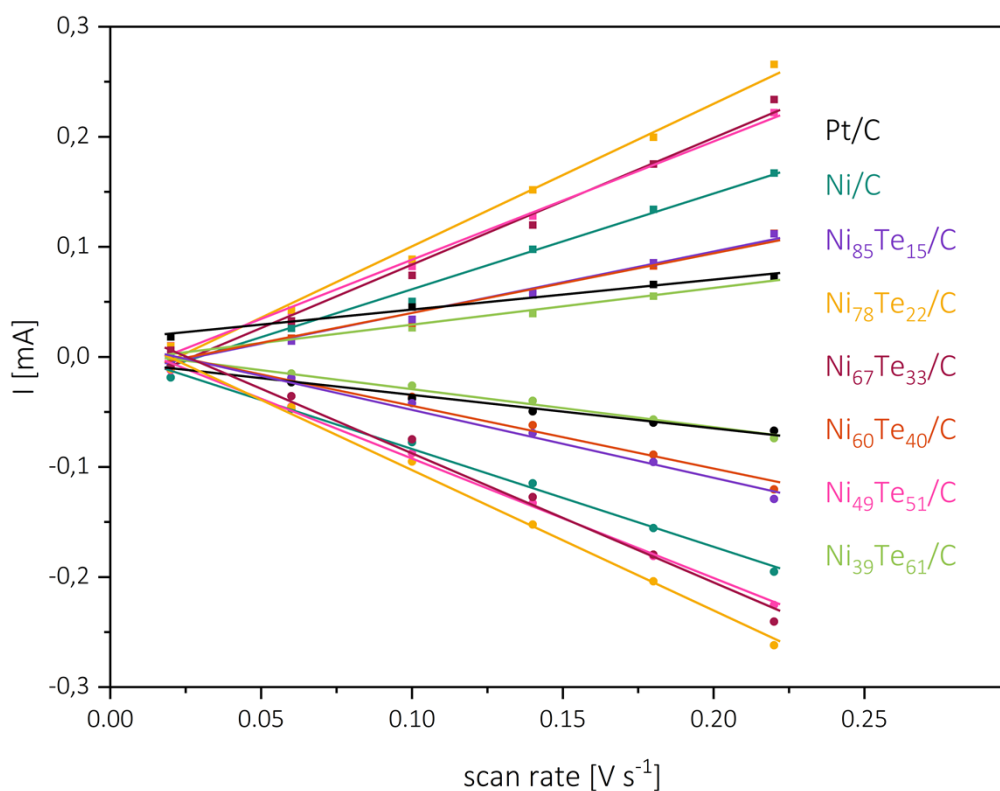

Figure S 4.: Cathodic (circles) and anodic (squares) charging currents measured at 0.10 V vs. RHE plotted as function of the scan rate. The determined double-layer capacitance of the system is taken as the average of the absolute value of the slope of the linear fits to the data.

Table S 3.: Calculated double layer capacitance ( $C_{DL}$ ) of the prepared electrodes.

| sample                               | $C_{DL}$ [mF] |
|--------------------------------------|---------------|
| Pt/C                                 | 0.288         |
| Ni/C                                 | 0.880         |
| Ni <sub>85</sub> Te <sub>15</sub> /C | 0.588         |
| Ni <sub>78</sub> Te <sub>22</sub> /C | 1.290         |
| Ni <sub>67</sub> Te <sub>33</sub> /C | 1.160         |
| Ni <sub>60</sub> Te <sub>40</sub> /C | 0.556         |
| Ni <sub>49</sub> Te <sub>51</sub> /C | 1.085         |
| Ni <sub>39</sub> Te <sub>61</sub> /C | 0.339         |
